# Supplementary material
Source: publisher site journal article supplement (https://www.dovepress.com/article/263225)
Supplement: Supplementary file 1 [file get_supplementary_file.php]

**Supplementary Information**

**Table S1 Bacteria strains used in this study.**

| Organism and phenotype | Source/Reference |
| --- | --- |
| *E. coli* 25922 | ATCC |
| *E. coli* B2 (*bla*NDM-5 + *mcr-1*) | [1] |
| *S. enteritidis* 13076 | ATCC |
| *A. baumannii* 19609 | ATCC |
| *P. aeruginosa* PA14 | [2] |

ATCC, American type culture collection;

[1] Liu Y, Yang K, Jia Y, Wang Z. Repurposing peptidomimetic as potential inhibitor of New Delhi metallo-beta-lactamases in Gram-negative bacteria. ACS Infect Dis 2019;5:2061-6.

[2] Zhu K, Chen S, Sysoeva TA, You L. Universal antibiotic tolerance arising from antibiotic-triggered accumulation of pyocyanin in *Pseudomonas aeruginosa*. PLoS Biol 2019;17:e3000573.

**Tables S2 Susceptibility measurement of *E. coli* ATCC 25922 and *E. coli* B2.**

| Strains | MIC (μg/mL) | | |
| --- | --- | --- | --- |
| Ampicillin | Kanamycin | Ciprofloxacin |
| *E. coli* ATCC 25922 | 8 | 4 | 0.008 |
| + Cysteine (10 mM) | 8 | 4 | 0.008 |
| *E. coli* B2 | >128 | >128 | 16 |
| + Cysteine (10 mM) | >128 | >128 | 16 |





**Figure S1 Amino acids alone (10 mM) could not eliminate *E. coli* B2 persisters.**

The initial bacterial counts were defined as 100% (red line).





**Figure S2 Effect of five amino acids on ROS production in *E. coli* B2 persisters.**

All data were shown as mean ± SD. n.s., not significant, **P* < 0.05, ***P* < 0.01, ****P* < 0.001, determined by one-way ANOVA.
